# Supplementary material for: Potential Effects of CXCL9 and CCL20 on Cardiac Fibrosis in Patients with Myocardial Infarction and Isoproterenol-Treated Rats
Source: PubMed Central journal article supplement (PMC6572441; doi:10.3390/jcm8050659), 2019-05-11
Supplement: jcm-08-00659-s001.pdf [file jcm-08-00659-s001.pdf]

## Supplementary Materials

**Supplementary Table S1.** Maximal blood levels of CK, CKMB, and Troponin-I in patients with MI\*.

| No  | Age | Gender | Presentation of MI | CK (U/L) | CKMB <sup>†</sup> (ng/mL) | Troponin-I <sup>‡</sup> (ng/mL) |
|-----|-----|--------|--------------------|----------|---------------------------|---------------------------------|
| #1  | 74  | F      | NSTEMI             | 996      | 104.1                     | 44.01                           |
| #2  | 51  | M      | STEMI              | 920      | 82.8                      | 13.81                           |
| #3  | 88  | M      | STEMI              | 1155     | 15.1                      | 1.52                            |
| #4  | 50  | M      | STEMI              | 3888     | 300                       | 80                              |
| #5  | 55  | M      | STEMI              | 1032     | 157.6                     | 29.46                           |
| #6  | 65  | M      | STEMI              | 1423     | 97.2                      | 39.16                           |
| #7  | 60  | F      | STEMI              | 552      | 82.7                      | 5.66                            |
| #8  | 38  | M      | STEMI              | 4604     | 298                       | 76.47                           |
| #9  | 45  | M      | STEMI              | 1257     | 128.8                     | 36.185                          |
| #10 | 44  | M      | STEMI              | 787      | 81.2                      | 5.259                           |
| #11 | 58  | M      | STEMI              | 252      | 4.5                       | —                               |
| #12 | 49  | M      | STEMI              | 4510     | 300                       | —                               |
| #13 | 44  | M      | STEMI              | 3493     | 300                       | 80                              |
| #14 | 56  | M      | STEMI              | 3675     | 300                       | 6.291                           |
| #15 | 53  | M      | STEMI              | 1778     | 138.1                     | 10.789                          |
| #16 | 72  | F      | STEMI              | 1695     | 118.8                     | 27.314                          |
| #17 | 86  | F      | STEMI              | 2014     | 257.6                     | 80                              |
| #18 | 55  | M      | STEMI              | 5491     | 300                       | 80                              |
| #19 | 89  | M      | STEMI              | 1624     | 295                       | 50.778                          |
| #20 | 51  | M      | STEMI              | 5421     | 300                       | 42.927                          |
| #21 | 40  | M      | STEMI              | 3971     | 256.3                     | 23.335                          |
| #22 | 77  | M      | STEMI              | 3080     | 168.9                     | 0.344                           |
| #23 | 62  | M      | STEMI              | 1168     | 124.7                     | 9.851                           |
| #24 | 58  | M      | STEMI              | 6299     | 300                       | 80                              |
| #25 | 55  | M      | STEMI              | 3475     | 300                       | 0.990                           |
| #26 | 68  | M      | STEMI              | 1730     | 168.4                     | 1.000                           |
| #27 | 64  | M      | STEMI              | 1028     | 82.8                      | 1.400                           |
| #28 | 55  | M      | STEMI              | 422      | 6.3                       | 5.50                            |
| #29 | 49  | M      | NSTEMI             | 1404     | 166.4                     | 1.800                           |
| #30 | 55  | M      | STEMI              | 106      | 16.2                      | 0.912                           |
| #31 | 54  | M      | STEMI              | 894      | 104.3                     | 25.629                          |

|     |    |   |        |       |       |        |
|-----|----|---|--------|-------|-------|--------|
| #32 | 47 | M | STEMI  | 1796  | 199   | 55.049 |
| #33 | 50 | M | STEMI  | 5684  | 300   | 80     |
| #34 | 68 | M | NSTEMI | 309   | 37.0  | 0.980  |
| #35 | 60 | M | STEMI  | 11353 | 300   | 80     |
| #36 | 56 | M | STEMI  | 2029  | 151.4 | 11.307 |
| #37 | 78 | F | STEMI  | 254   | 32.1  | 4.442  |
| #38 | 45 | M | STEMI  | 1704  | 137.7 | 13.318 |
| #39 | 69 | M | NSTEMI | 71    | 9.0   | —      |
| #40 | 41 | M | NSTEMI | 657   | 60.5  | 0.650  |
| #41 | 83 | M | STEMI  | 3240  | 300   | 29.466 |
| #42 | 31 | F | STEMI  | 2411  | 241.9 | 13.520 |
| #43 | 50 | M | STEMI  | 5256  | 300   | 80     |
| #44 | 65 | M | STEMI  | 2477  | 300   | 2.443  |
| #45 | 62 | M | NSTEMI | 845   | 35    | 3.200  |
| #46 | 62 | M | NSTEMI | 96    | 8.8   | 0.653  |
| #47 | 70 | M | STEMI  | 1049  | 104.8 | 9.750  |

Abbreviation: CK=creatine kinase; F=female; M=male; MI=myocardial infarction; N=Non-ST-elevation myocardial infarction; STEMI=ST-elevation myocardial infarction.

"—" indicated missing data.

\*This table presented laboratory data of CK, CKMB, and Troponin-I from 47 patients with MI.

†CK value was presented as "300" when the patient's blood CK levels were more than the upper limit value (300 ng/mL) in the laboratory of our institution.

‡Troponin-I value was presented as "80" when the patient's blood Troponin-I levels were more than the upper limit value (80 ng/mL) in the laboratory of our institution.
